# Supplementary material for: Facile preparation of highly electrically conductive films of silver nanoparticles finely dispersed in polyisobutylene-b-poly(oxyethylene)-b-polyisobutylene triblock copolymers and graphene oxide hybrid surfactants
Source: Royal Society of Chemistry journal article supplement (doi:10.1039/c5ra21696f), 2015-01-01
Supplement: c5ra21696f1.pdf [file c5ra21696f1.pdf]

## Supporting Information

Facile preparation of highly electrically conductive films of silver nanoparticles finely dispersed in polyisobutylene-*b*-poly(oxyethylene)-*b*-polyisobutylene triblock copolymers and graphene oxide hybrid surfactants

Chih-Wei Chiu\* and Gang-Bo Ou

Department of Materials Science and Engineering, National Taiwan University of Science and Technology, Taipei 10607, Taiwan

\* Corresponding author:

Tel: +886-2-2737-6521; Fax: +886-2-2737-6544; E-mail: [cwchiu@mail.ntust.edu.tw](mailto:cwchiu@mail.ntust.edu.tw)

## Contents:

**Scheme S1.** Reduction of  $\text{Ag}^+$  to  $\text{Ag}^0$  using DMF/ $\text{H}_2\text{O}$ .

**Fig. S1** TEM micrographs of colloidal AgNPs in an  $\text{AgNO}_3/\text{PIB-POE-PIB/GO-4\%}$  complex reduction with weight ratios of (a) 5:5:1, (b) 10:10:1, and (c) 20:20:1.

**Fig. S2** TEM micrographs of colloidal AgNPs in an  $\text{AgNO}_3/\text{PIB-POE-PIB/GO-20\%}$  complex reduction with weight ratios of (a) 5:5:1, (b) 10:10:1, and (c) 20:20:1.

**Fig. S3** TEM micrographs of colloidal AgNPs in an  $\text{AgNO}_3/\text{PIB-POE-PIB/GO-50\%}$  complex reduction with weight ratios of (a) 5:5:1, (b) 10:10:1, and (c) 20:20:1.

**Fig. S4** Energy dispersive spectrometric (EDS) analysis of AgNP/PIB-POE-PIB/GO-50% nanohybrid film with a 20:20:1 weight ratio at 300 °C. Analysis shows the upper surface of the film.

**Fig. S5** Demonstration of conductive and flexible properties of the AgNP/PIB-POE-PIB/GO-50% hybrid films at 350 °C on the polyimide (PI) substrate.

**Table S1.** Sheet resistance of GO and AgNP/PIB-POE-PIB/GO nanohybrid films with 350 °C heat treatment.

**Table S2.** Sheet resistance of the AgNP/PIB-POE-PIB/GO-50% nanohybrid film with a weight ratio of 20:20:1 and heat-treated at 350 °C.

**Video S1.** A movie showing a demonstration of LED bulbs illuminated using the electrical conductivity of the nanohybrid films is provided.

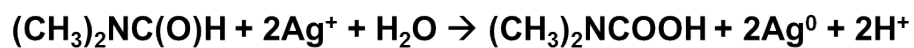

**Scheme S1.** Reduction of  $\text{Ag}^+$  to  $\text{Ag}^0$  using DMF/ $\text{H}_2\text{O}$ .

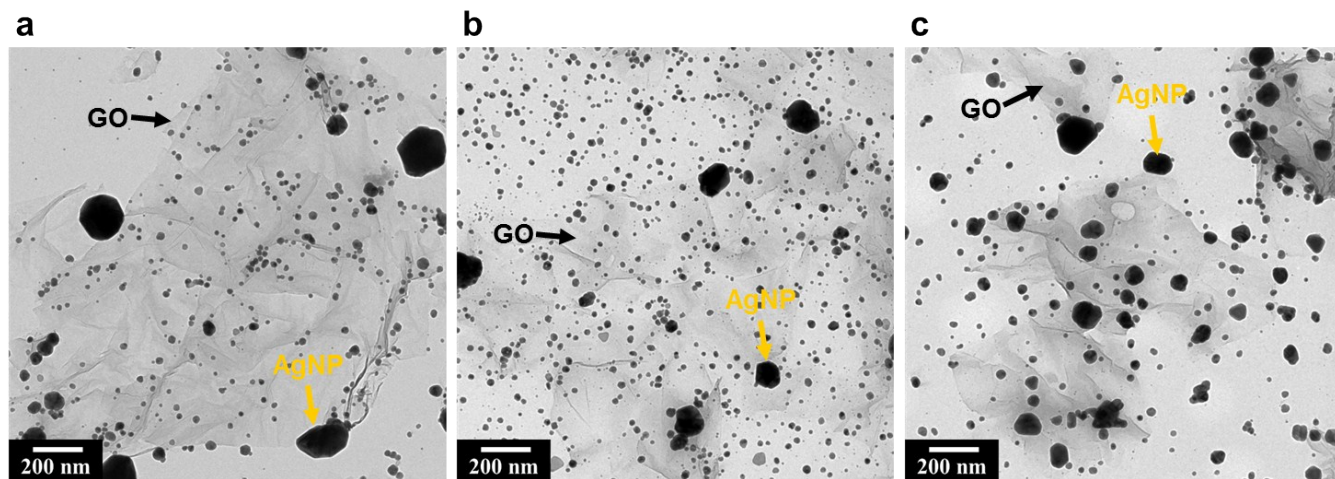

**Fig. S1** TEM micrographs of colloidal AgNPs in an  $\text{AgNO}_3$ /PIB-POE-PIB/GO-4% complex reduction with weight ratios of (a) 5:5:1, (b) 10:10:1, and (c) 20:20:1.

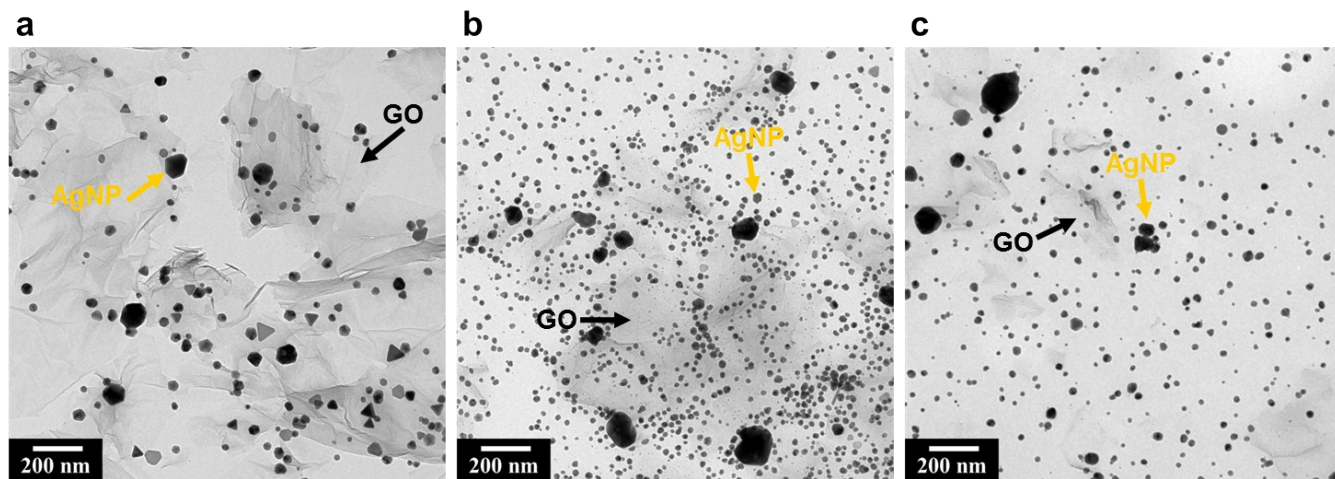

**Fig. S2** TEM micrographs of colloidal AgNPs in an  $\text{AgNO}_3$ /PIB-POE-PIB/GO-20% complex reduction with weight ratios of (a) 5:5:1, (b) 10:10:1, and (c) 20:20:1.

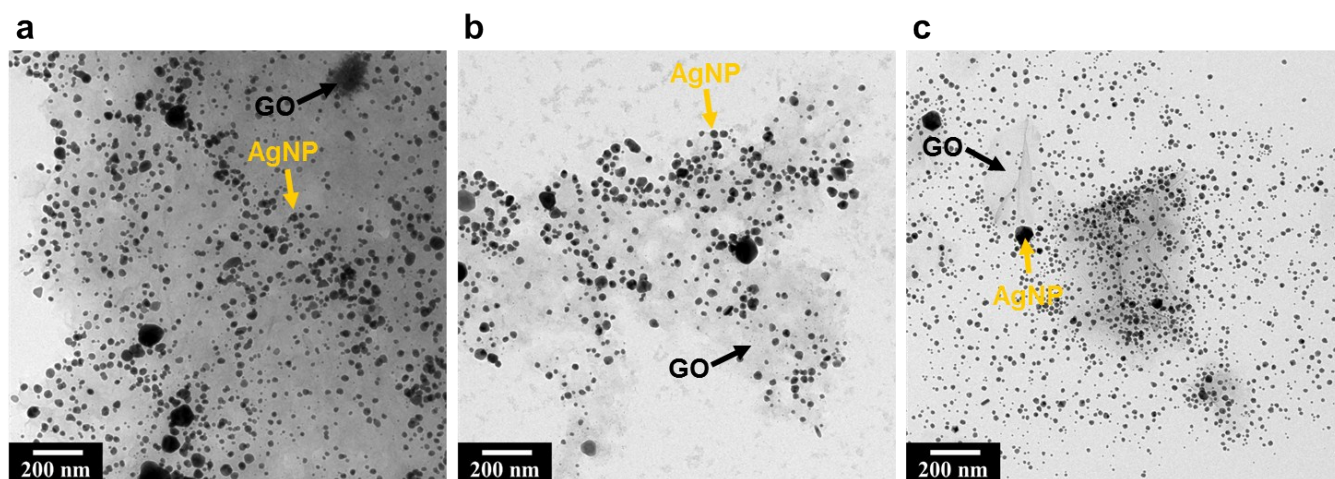

**Fig. S3** TEM micrographs of colloidal AgNPs in an AgNO<sub>3</sub>/PIB-POE-PIB/GO-50% complex reduction with weight ratios of (a) 5:5:1, (b) 10:10:1, and (c) 20:20:1.

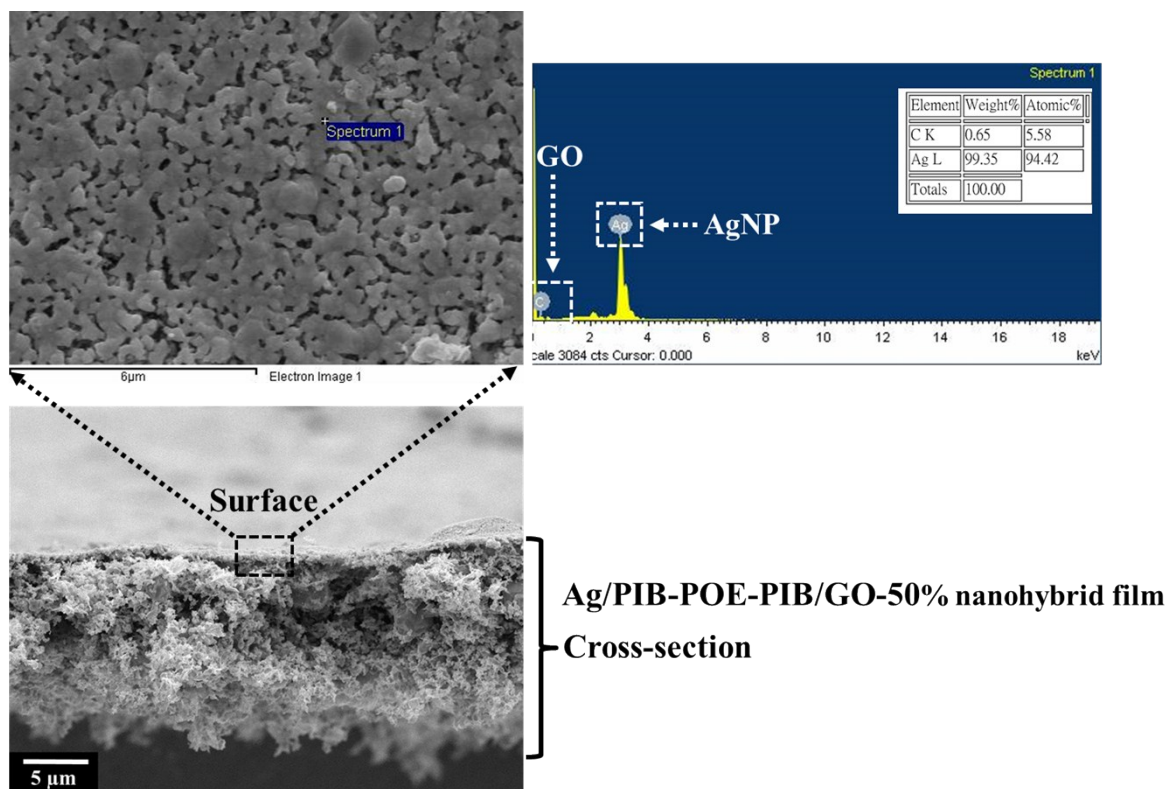

**Fig. S4** Energy dispersive spectrometric (EDS) analysis of AgNP/PIB-POE-PIB/GO-50% nanohybrid film with a 20:20:1 weight ratio at 300 °C. Analysis shows the upper surface of the film.

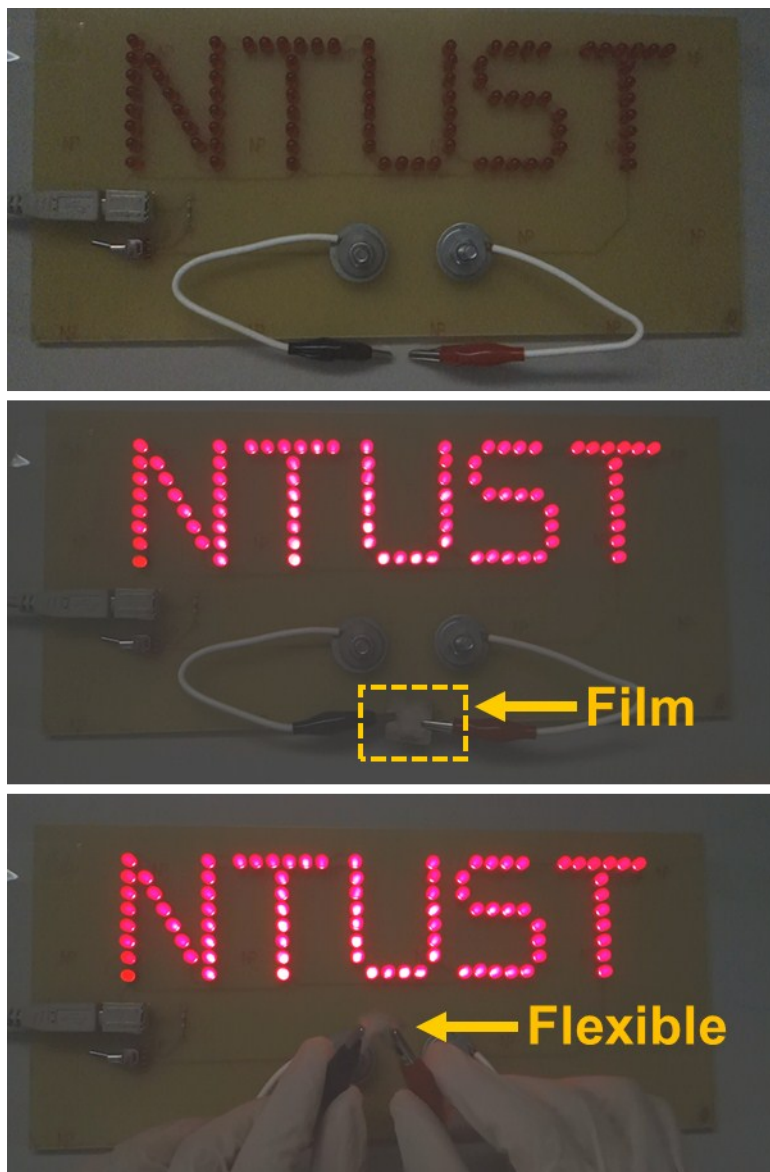

**Fig. S5** Demonstration of conductive and flexible properties of the AgNP/PIB-POE-PIB/GO-50% hybrid films at 350 °C on the polyimide (PI) substrate.

**Table S1.** Sheet resistance of GO and AgNP/PIB-POE-PIB/GO nanohybrid films with 350 °C heat treatment.

| Sample <sup>a</sup>     | Weight ratio<br>(w/w/w) | Sheet resistance<br>(Ω/sq) <sup>b</sup> |
|-------------------------|-------------------------|-----------------------------------------|
| GO-4%                   | --                      | $5.8 \times 10^1$                       |
| GO-20%                  | --                      | $2.1 \times 10^1$                       |
| GO-50%                  | --                      | $8.6 \times 10^6$                       |
| AgNP/PIB-POE-PIB/GO-50% | 40:40:1                 | $1.4 \times 10^{-1}$                    |

<sup>a</sup> Solution coating on a glass substrate.

<sup>b</sup> Solution coating on 60 μm-thick films and the resulting sheet resistance measured using a four-point probe.

**Table S2.** Sheet resistance of the AgNP/PIB-POE-PIB/GO-50% nanohybrid film with a weight ratio of 20:20:1 and heat-treated at 350 °C.

| Sample <sup>a</sup>     | Thickness<br>(μm) | Sheet Resistance<br>(Ω/sq) <sup>b</sup> |
|-------------------------|-------------------|-----------------------------------------|
| AgNP/PIB-POE-PIB/GO-50% | 30                | $7.8 \times 10^{-2}$                    |
|                         | 60                | $5.2 \times 10^{-2}$                    |

<sup>a</sup> Solution coated on a glass substrate.

<sup>b</sup> Sheet resistance measured using a four-point probe.
